# Supplementary material for: Self-assembly of neutral and cationic PdII organometallic molecular rectangles: synthesis, characterization and nitroaromatic sensing
Source: Royal Society of Chemistry journal article supplement (doi:10.1039/c0dt01048k), 2011-01-01
Supplement: c0dt01048k.pdf [file c0dt01048k.pdf]

# Supporting Information

## Self-assembly of neutral and cationic Pd<sup>II</sup> organometallic molecular rectangles: syntheses, characterizations and nitroaromatics sensing

Arun Kumar Bar<sup>a</sup>, Sankarasekaran Shanmugaraju<sup>a</sup>, Ki-Whan Chi<sup>b</sup>, and Partha Sarathi Mukherjee<sup>a\*</sup>

<sup>a</sup> Department of Inorganic and Physical Chemistry, Indian Institute of Science, Bangalore-560012, India. Fax: 91-80-23601552; Tel: 91-80-2293-3352

E-mail: [psm@ipc.iisc.ernet.in](mailto:psm@ipc.iisc.ernet.in)

<sup>b</sup> Department of Chemistry, University of Ulsan, Ulsan 680-749 Republic of Korea.

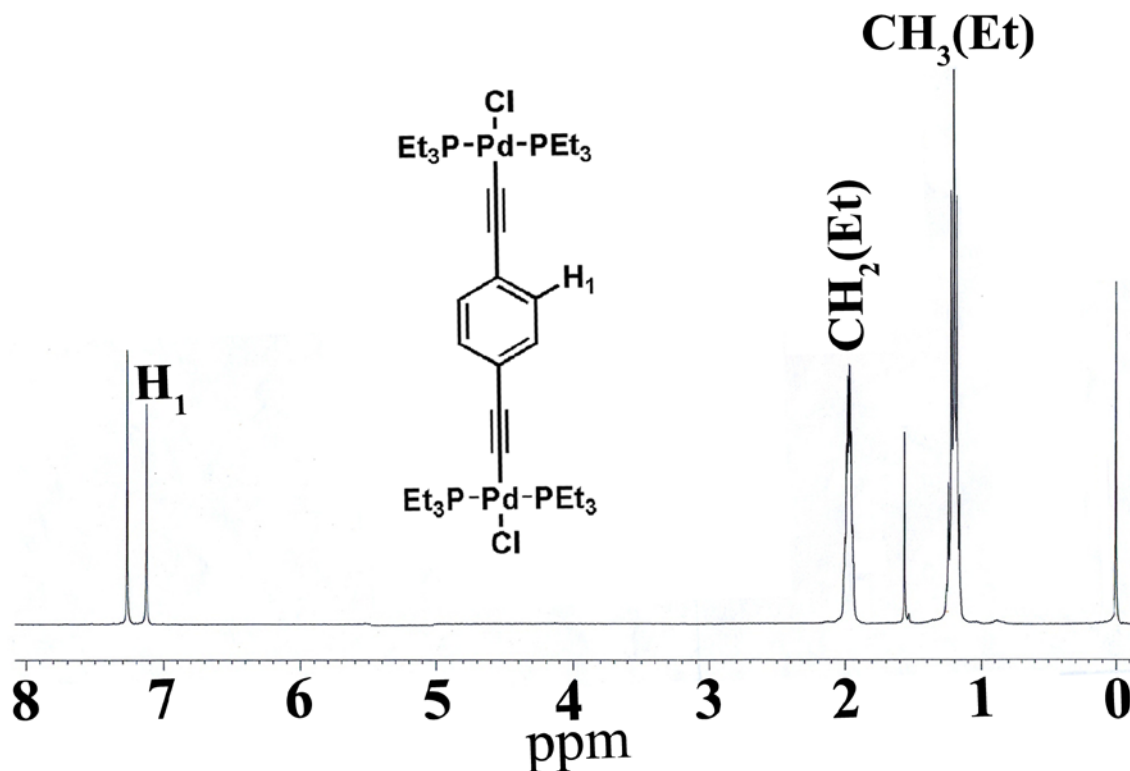

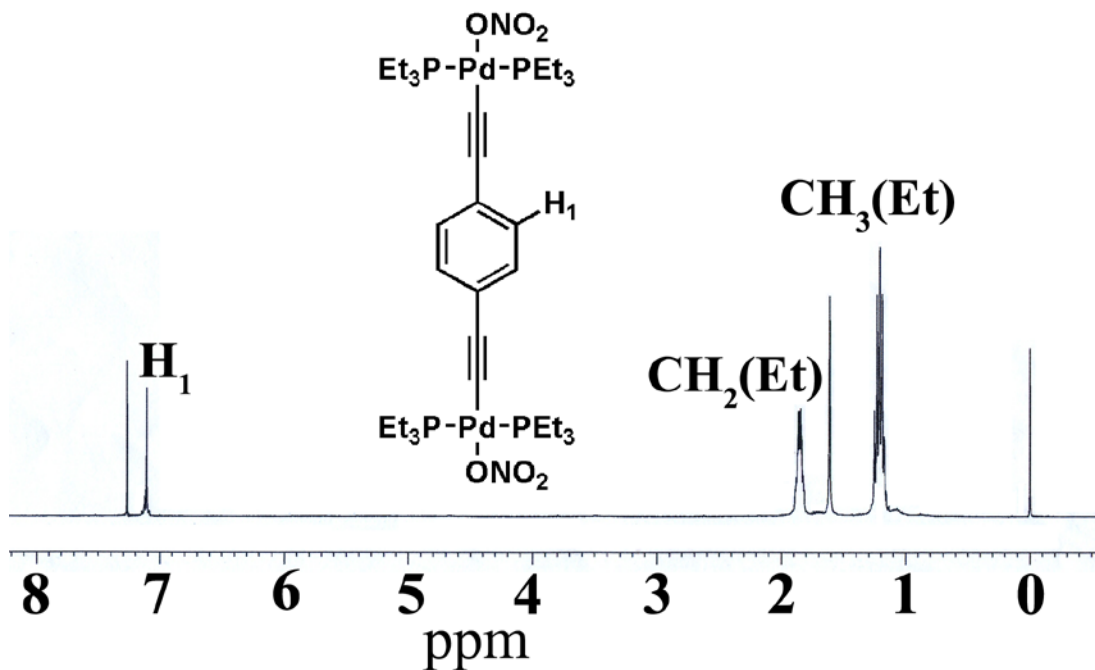

**Fig.S1.**  $^1\text{H}$  NMR spectra of the 1,4-bis[*trans*-(ethynyl)Pd(PEt<sub>3</sub>)<sub>2</sub>(Cl)]benzene (top) and  $\text{M}_2$  (bottom) recorded in chloroform.

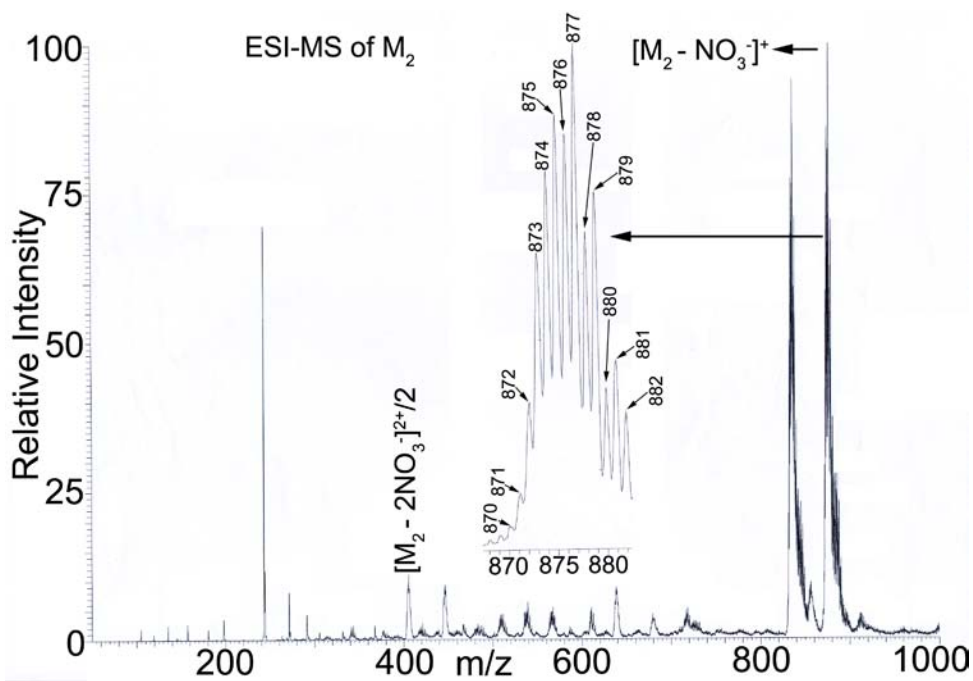

**Fig.S2.** ESI-MS spectra of  $\text{M}_2$  along with isotopic distribution pattern (inlet).

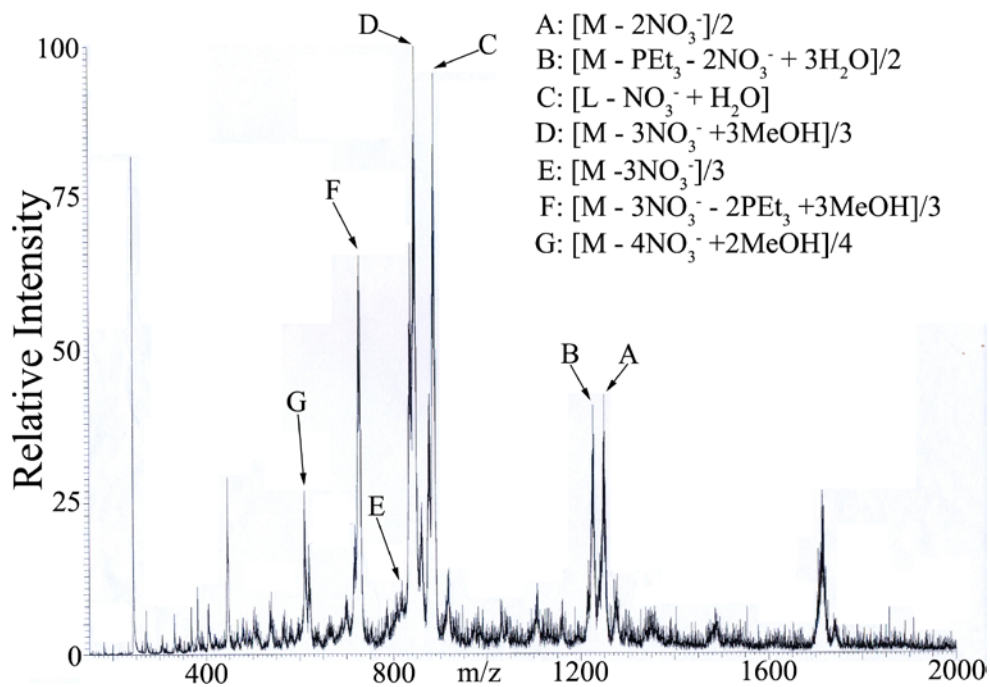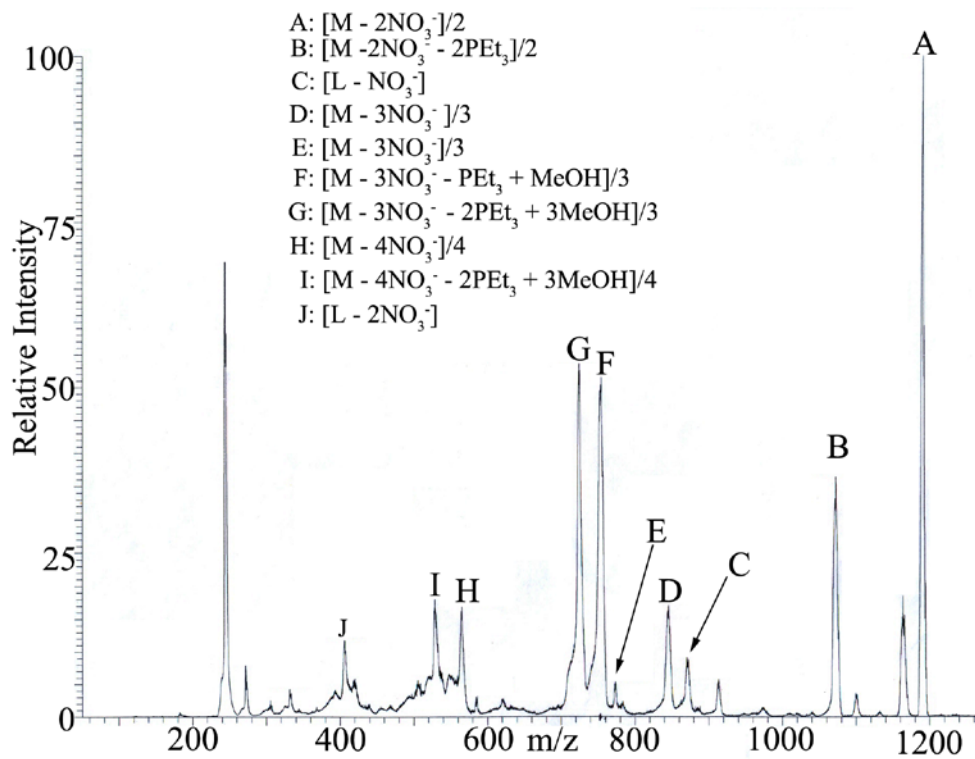

**Fig.S3.** ESI-MS spectra of the complex **2** (top) and complex **3** (bottom).

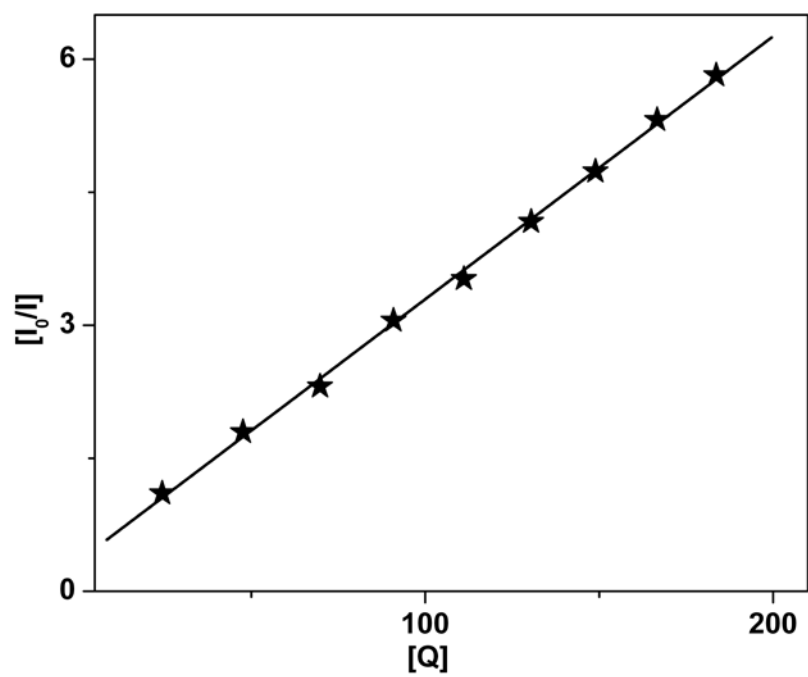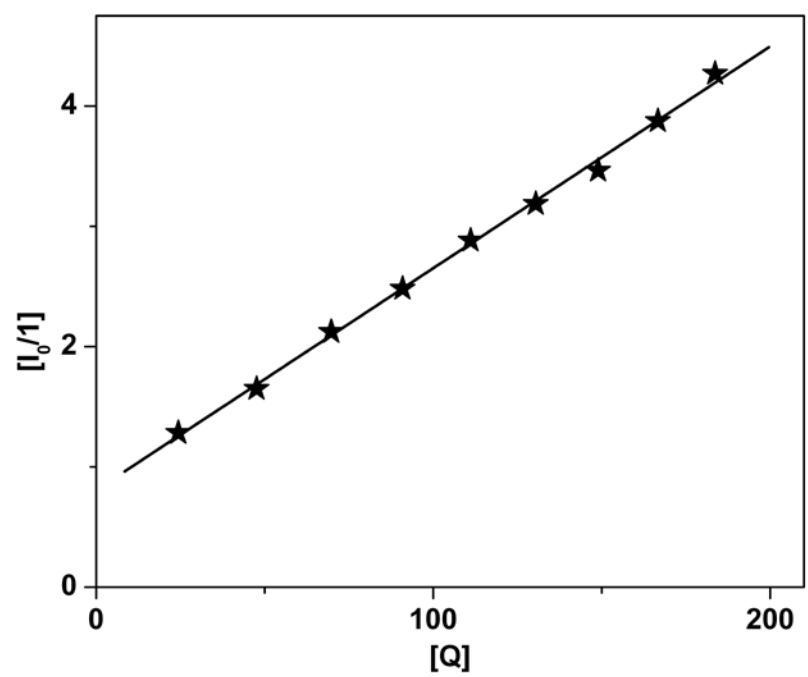

**Fig.S4.** Calculated Stern-Volmer plot of the complex 1 (top) and complex 2 (bottom).

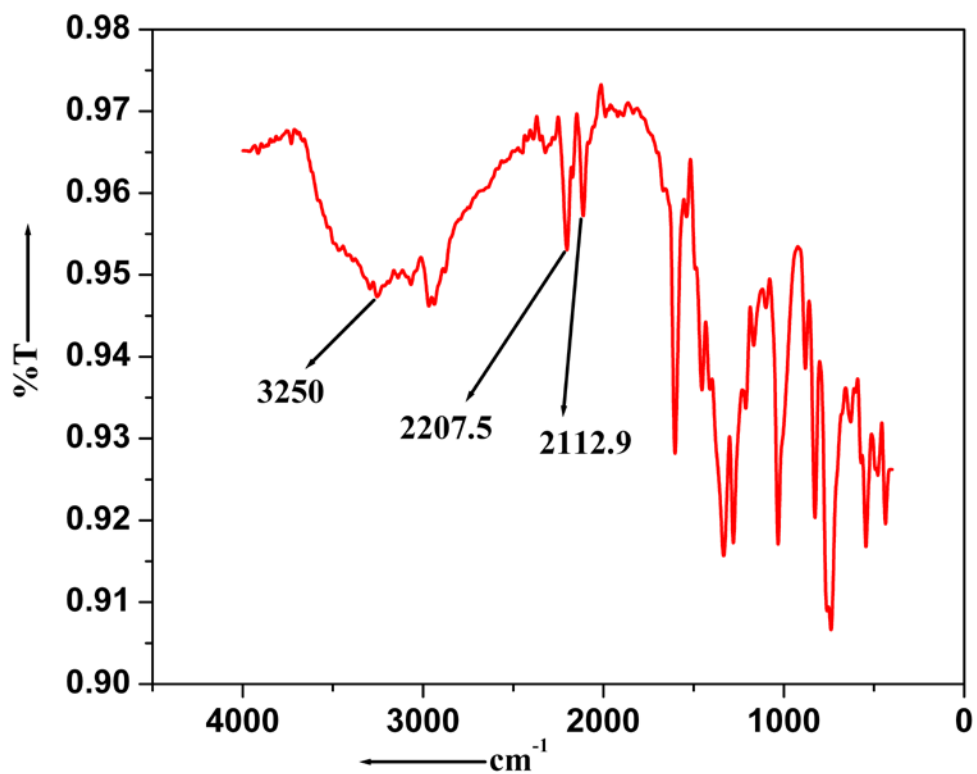

Fig.S5. KBr phase IR spectrum of the complex 3.

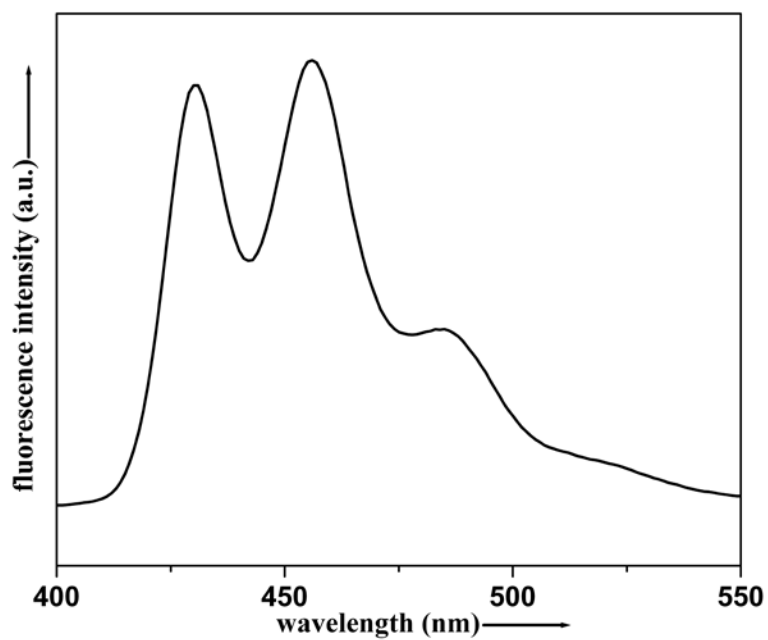

Fig.S6. Emission spectrum of the complex 3 recorded in THF at excited at 270 nm.

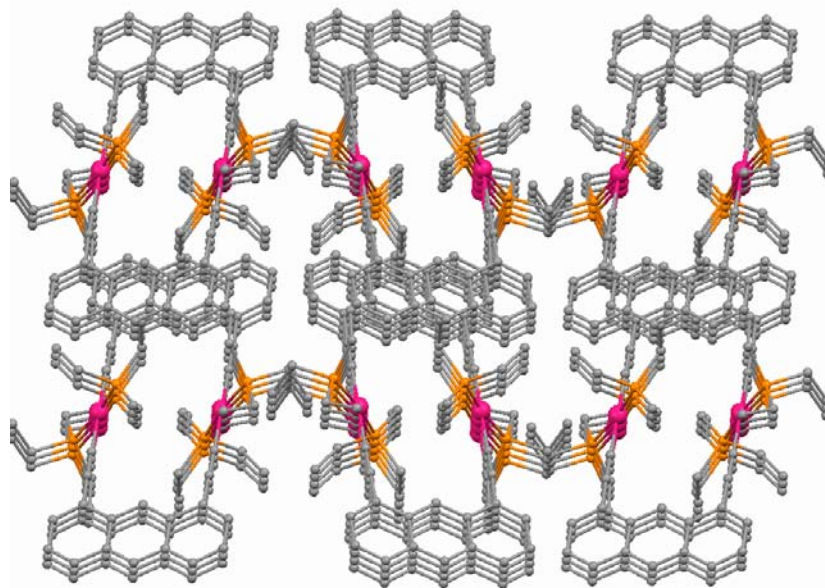

**Fig S7:** View of the 1D channels in the structure of complex **1** viewed along *c* axis.
